# Supplementary material for: Robustness analysis in an inter-cities mobility network: modeling municipal, state and federal initiatives as failures and attacks toward SARS-CoV-2 containment
Source: PeerJ journal article supplement (doi:10.7717/peerj.10287), 2020-11-05
Supplement: SUPPLEMENTAL_MATERIAL.pdf [file SUPPLEMENTAL_MATERIAL.pdf]

## Supplemental Material

Tables S1, S2, and S3 refer to the list of the 27 Brazilian States (BS) sorted according to their associated network metric under  $\eta_0$ ,  $\eta_1$  and  $\eta_2$ , respectively. In the second column of each Table, the states are ordered according to the date they reported the first COVID-19 patient.

Tables S4, S5, and S6, refer to the list of the first 30 cities of Sao Paulo State (SP) sorted according to their associated metric under  $\eta_0$ ,  $\eta_1$  and  $\eta_2$ , respectively. In the second column, the cities are ordered according to the date they reported the first COVID-19 patient.

Tables S7, S8, and S9, refer to the list of the first 30 Brazilian cities (BR) sorted according to their associated metric under  $\eta_0$ ,  $\eta_1$  and  $\eta_2$ , respectively. In the second column, the cities are ordered according to the date they reported the first COVID-19 patient. The states' acronyms mean the following: Acre (AC), Alagoas (AL), Amapá (AP), Amazonas (AM), Bahia (BA), Ceará (CE), Distrito Federal (DF), Espírito Santo (ES), Goiás (GO), Maranhão (MA), Mato Grosso (MT), Mato Grosso do Sul (MS), Minas Gerais (MG), Pará (PA), Paraíba (PB), Paraná (PR), Pernambuco (PE), Piauí (PI), Rio Grande do Norte (RN), Rio Grande do Sul (RS), Rio de Janeiro (RJ), Rondônia (RO), Roraima (RR), Santa Catarina (SC), São Paulo (SP), Sergipe (SE), Tocantins (TO).

Table S1: List of the 27 Brazilian States (BS) sorted according to their associated metric under  $\eta_0$ . In the second column, the states are ordered according to the date of their first confirmed case.

|    | COVID-19            | $s$                 | $k$                 | $\mathcal{V}$       | $b$                 |
|----|---------------------|---------------------|---------------------|---------------------|---------------------|
| 1  | São Paulo           | São Paulo           | Distrito Federal    | Pará                | Pará                |
| 2  | Rio de Janeiro      | Paraná              | São Paulo           | Distrito Federal    | Rondônia            |
| 3  | Bahia               | Minas Gerais        | Minas Gerais        | São Paulo           | Acre                |
| 4  | Distrito Federal    | Goiás               | Goiás               | Minas Gerais        | Alagoas             |
| 5  | Minas Gerais        | Bahia               | Bahia               | Goiás               | Distrito Federal    |
| 6  | Alagoas             | Santa Catarina      | Pará                | Bahia               | São Paulo           |
| 7  | Rio Grande so Sul   | Mato Grosso         | Mato Grosso         | Mato Grosso         | Minas Gerais        |
| 8  | Paraná              | Rio Grande so Sul   | Rio de Janeiro      | Alagoas             | Goiás               |
| 9  | Santa Catarina      | Mato Grosso do Sul  | Alagoas             | Pernambuco          | Amazonas            |
| 10 | Goiás               | Maranhão            | Pernambuco          | Maranhão            | Bahia               |
| 11 | Rio Grande do Norte | Pará                | Maranhão            | Rio de Janeiro      | Mato Grosso         |
| 12 | Pernambuco          | Pernambuco          | Paraná              | Rondônia            | Maranhão            |
| 13 | Amazonas            | Tocantins           | Sergipe             | Paraná              | Pernambuco          |
| 14 | Sergipe             | Rio de Janeiro      | Ceará               | Sergipe             | Paraná              |
| 15 | Mato Grosso do Sul  | Ceará               | Tocantins           | Tocantins           | Tocantins           |
| 16 | Ceará               | Piauí               | Rondônia            | Ceará               | Rio de Janeiro      |
| 17 | Acre                | Rondônia            | Mato Grosso do Sul  | Mato Grosso do Sul  | Sergipe             |
| 18 | Pará                | Paraíba             | Rio Grande so Sul   | Rio Grande so Sul   | Ceará               |
| 19 | Paraíba             | Distrito Federal    | Piauí               | Piauí               | Mato Grosso do Sul  |
| 20 | Tocantins           | Sergipe             | Santa Catarina      | Santa Catarina      | Rio Grande so Sul   |
| 21 | Espírito Santo      | Espírito Santo      | Espírito Santo      | Espírito Santo      | Santa Catarina      |
| 22 | Piauí               | Alagoas             | Paraíba             | Paraíba             | Espírito Santo      |
| 23 | Mato Grosso         | Rio Grande do Norte | Rio Grande do Norte | Rio Grande do Norte | Piauí               |
| 24 | Rondônia            | Acre                | Acre                | Acre                | Paraíba             |
| 25 | Amapá               | Amazonas            | Amazonas            | Amazonas            | Rio Grande do Norte |
| 26 | Maranhão            | Roraima             | Roraima             | Roraima             | Amapá               |
| 27 | Roraima             | Amapá               | Amapá               | Amapá               | Roraima             |

Table S2: List of the 27 Brazilian States (BS) sorted according to their associated metric under  $\eta_1$ . In the second column, the states are ordered according to the date of their first confirmed case.

|    | COVID-19            | $s$                 | $k$                 | $\mathcal{V}$       | $b$                 |
|----|---------------------|---------------------|---------------------|---------------------|---------------------|
| 1  | São Paulo           | São Paulo           | Goiás               | Bahia               | Bahia               |
| 2  | Rio de Janeiro      | Paraná              | Bahia               | Goiás               | Goiás               |
| 3  | Bahia               | Minas Gerais        | Mato Grosso         | São Paulo           | São Paulo           |
| 4  | Distrito Federal    | Santa Catarina      | São Paulo           | Paraíba             | Pernambuco          |
| 5  | Minas Gerais        | Goiás               | Mato Grosso do Sul  | Mato Grosso         | Ceará               |
| 6  | Alagoas             | Bahia               | Paraná              | Minas Gerais        | Paraíba             |
| 7  | Rio Grande do Sul   | Mato Grosso         | Minas Gerais        | Maranhão            | Maranhão            |
| 8  | Paraná              | Mato Grosso do Sul  | Santa Catarina      | Ceará               | Mato Grosso         |
| 9  | Santa Catarina      | Rio Grande do Sul   | Pernambuco          | Pernambuco          | Minas Gerais        |
| 10 | Goiás               | Maranhão            | Ceará               | Paraná              | Paraná              |
| 11 | Rio Grande do Norte | Pará                | Maranhão            | Mato Grosso do Sul  | Sergipe             |
| 12 | Pernambuco          | Pernambuco          | Rio Grande do Sul   | Pará                | Mato Grosso do Sul  |
| 13 | Amazonas            | Tocantins           | Piauí               | Piauí               | Pará                |
| 14 | Sergipe             | Rio de Janeiro      | Pará                | Distrito Federal    | Piauí               |
| 15 | Mato Grosso do Sul  | Ceará               | Distrito Federal    | Santa Catarina      | Espírito Santo      |
| 16 | Ceará               | Piauí               | Rio de Janeiro      | Rondônia            | Santa Catarina      |
| 17 | Acre                | Rondônia            | Espírito Santo      | Tocantins           | Rio de Janeiro      |
| 18 | Pará                | Paraíba             | Paraíba             | Espírito Santo      | Alagoas             |
| 19 | Paraíba             | Espírito Santo      | Tocantins           | Rio de Janeiro      | Rondônia            |
| 20 | Tocantins           | Distrito Federal    | Rondônia            | Sergipe             | Distrito Federal    |
| 21 | Espírito Santo      | Sergipe             | Sergipe             | Rio Grande do Sul   | Rio Grande do Sul   |
| 22 | Piauí               | Alagoas             | Alagoas             | Alagoas             | Rio Grande do Norte |
| 23 | Mato Grosso         | Rio Grande do Norte | Rio Grande do Norte | Rio Grande do Norte | Tocantins           |
| 24 | Rondônia            | Amapá               | Amapá               | Amapá               | Amapá               |
| 25 | Amapá               | Roraima             | Roraima             | Roraima             | Roraima             |
| 26 | Maranhão            | Amazonas            | Amazonas            | Amazonas            | Amazonas            |
| 27 | Roraima             | Acre                | Acre                | Acre                | Acre                |

Table S3: List of the 27 Brazilian States (BS) sorted according to their associated metric under  $\eta_2$ . In the second column, the states are ordered according to the date of their first confirmed case.

|    | COVID-19            | $s$                 | $k$                 | $\mathcal{V}$       | $b$                 |
|----|---------------------|---------------------|---------------------|---------------------|---------------------|
| 1  | São Paulo           | São Paulo           | Paraná              | Goiás               | Goiás               |
| 2  | Rio de Janeiro      | Paraná              | São Paulo           | Paraná              | Mato Grosso         |
| 3  | Bahia               | Minas Gerais        | Mato Grosso         | Mato Grosso         | Paraná              |
| 4  | Distrito Federal    | Santa Catarina      | Minas Gerais        | Tocantins           | Tocantins           |
| 5  | Minas Gerais        | Mato Grosso         | Goiás               | São Paulo           | São Paulo           |
| 6  | Alagoas             | Rio Grande so Sul   | Mato Grosso do Sul  | Bahia               | Minas Gerais        |
| 7  | Rio Grande so Sul   | Bahia               | Bahia               | Minas Gerais        | Bahia               |
| 8  | Paraná              | Mato Grosso do Sul  | Tocantins           | Mato Grosso do Sul  | Mato Grosso do Sul  |
| 9  | Santa Catarina      | Goiás               | Rio Grande so Sul   | Rio de Janeiro      | Distrito Federal    |
| 10 | Goiás               | Tocantins           | Santa Catarina      | Rio Grande so Sul   | Rio Grande so Sul   |
| 11 | Rio Grande do Norte | Pará                | Rio de Janeiro      | Santa Catarina      | Santa Catarina      |
| 12 | Pernambuco          | Maranhão            | Maranhão            | Rondônia            | Rio de Janeiro      |
| 13 | Amazonas            | Rio de Janeiro      | Pará                | Maranhão            | Espírito Santo      |
| 14 | Sergipe             | Rondônia            | Sergipe             | Pará                | Sergipe             |
| 15 | Mato Grosso do Sul  | Sergipe             | Pernambuco          | Sergipe             | Alagoas             |
| 16 | Ceará               | Pernambuco          | Paraíba             | Pernambuco          | Pernambuco          |
| 17 | Acre                | Paraíba             | Rondônia            | Paraíba             | Paraíba             |
| 18 | Pará                | Distrito Federal    | Distrito Federal    | Distrito Federal    | Rio Grande do Norte |
| 19 | Paraíba             | Espírito Santo      | Espírito Santo      | Espírito Santo      | Ceará               |
| 20 | Tocantins           | Alagoas             | Alagoas             | Alagoas             | Piauí               |
| 21 | Espírito Santo      | Rio Grande do Norte | Rio Grande do Norte | Rio Grande do Norte | Maranhão            |
| 22 | Piauí               | Ceará               | Ceará               | Ceará               | Amapá               |
| 23 | Mato Grosso         | Piauí               | Piauí               | Piauí               | Pará                |
| 24 | Rondônia            | Amapá               | Amapá               | Amapá               | Roraima             |
| 25 | Amapá               | Roraima             | Roraima             | Roraima             | Amazonas            |
| 26 | Maranhão            | Amazonas            | Amazonas            | Amazonas            | Acre                |
| 27 | Roraima             | Acre                | Acre                | Acre                | Rondônia            |

Table S4: List of the first 30 cities from the Sao Paulo State (SP) sorted according to their associated metric under  $\eta_0$ . In the second column, the cities are ordered according to the date of their first confirmed case.

|    | COVID-19               | $s$                   | $k$                   | $\mathcal{V}$         | $b$                   |
|----|------------------------|-----------------------|-----------------------|-----------------------|-----------------------|
| 1  | São Paulo              | São Paulo             | São Paulo             | São Paulo             | São Paulo             |
| 2  | Santana de Parnaíba    | Campinas              | Campinas              | São José do Rio Preto | Campinas              |
| 3  | Ferraz de Vasconcelos  | Ribeirão Preto        | São José do Rio Preto | Ribeirão Preto        | São José do Rio Preto |
| 4  | Mauá                   | São José do Rio Preto | Ribeirão Preto        | Franca                | Ribeirão Preto        |
| 5  | Santo André            | Peruíbe               | Americana             | Sorocaba              | Presidente Prudente   |
| 6  | São Bernardo do Campo  | Sorocaba              | Bauru                 | Taubaté               | Bauru                 |
| 7  | São Caetano do Sul     | Presidente Prudente   | Piracicaba            | Assis                 | Sorocaba              |
| 8  | Guarulhos              | Piracicaba            | Marília               | Penápolis             | Piracicaba            |
| 9  | Barueri                | Jundiaí               | Presidente Prudente   | Piracicaba            | Marília               |
| 10 | Campinas               | Americana             | Santo André           | Santa Fé do Sul       | Araçatuba             |
| 11 | Cotia                  | Bauru                 | Sorocaba              | Apiáí                 | Americana             |
| 12 | Jaguariúna             | Marília               | Araçatuba             | Santa Isabel          | Assis                 |
| 13 | Osasco                 | Araraquara            | Araraquara            | Pirapora do Bom Jesus | Catanduva             |
| 14 | São José do Rio Preto  | Mogi das Cruzes       | São Bernardo do Campo | Presidente Prudente   | Jales                 |
| 15 | São José dos Campos    | Santa Isabel          | São Carlos            | Campinas              | Taubaté               |
| 16 | Suzano                 | Jaboticabal           | Jaboticabal           | Jales                 | São José dos Campos   |
| 17 | Taubaté                | São Carlos            | Jundiaí               | Rio Claro             | Jundiaí               |
| 18 | Vargem Grande Paulista | São José dos Campos   | Rio Claro             | Tupã                  | Franca                |
| 19 | Hortolândia            | Praia Grande          | Osasco                | Lins                  | Jaboticabal           |
| 20 | Mogi das Cruzes        | Rio Claro             | Santos                | Barretos              | Santo André           |
| 21 | Embu das Artes         | Assis                 | Limeira               | Araçatuba             | Araraquara            |
| 22 | Iracemápolis           | Tupã                  | Assis                 | Oswaldo Cruz          | Santos                |
| 23 | Jundiaí                | Taubaté               | Tupã                  | Bauru                 | Itapetininga          |
| 24 | Poá                    | Limeira               | Catanduva             | Catanduva             | Ourinhos              |
| 25 | Ribeirão Pires         | São Vicente           | Birigui               | Monte Alto            | Osasco                |
| 26 | Rio Claro              | Santos                | Lins                  | Avaré                 | São Bernardo do Campo |
| 27 | São Sebastião          | Araçatuba             | Itapetininga          | Capão Bonito          | Barretos              |
| 28 | Taboão da Serra        | Itapetininga          | São Vicente           | Leme                  | Rio Claro             |
| 29 | Valinhos               | Registro              | São José dos Campos   | Bragança Paulista     | Tupã                  |
| 30 | Arujá                  | Sertãozinho           | Penápolis             | Paraguaçu Paulista    | Lins                  |

Table S5: List of the first 30 cities from the Sao Paulo State (SP) sorted according to their associated metric under  $\eta_1$ . In the second column, the cities are ordered according to the date of their first confirmed case.

|    | COVID-19               | $s$                   | $k$                   | $\mathcal{V}$         | $b$                   |
|----|------------------------|-----------------------|-----------------------|-----------------------|-----------------------|
| 1  | São Paulo              | São Paulo             | São Paulo             | São Paulo             | São Paulo             |
| 2  | Santana de Parnaíba    | Campinas              | Campinas              | Ribeirão Preto        | São José do Rio Preto |
| 3  | Ferraz de Vasconcelos  | Ribeirão Preto        | São José do Rio Preto | São José do Rio Preto | Campinas              |
| 4  | Mauá                   | São José do Rio Preto | Ribeirão Preto        | Presidente Prudente   | Ribeirão Preto        |
| 5  | Santo André            | Peruíbe               | Presidente Prudente   | Bauru                 | Presidente Prudente   |
| 6  | São Bernardo do Campo  | Presidente Prudente   | Marília               | Campinas              | Marília               |
| 7  | São Caetano do Sul     | Mogi das Cruzes       | Bauru                 | Franca                | Bauru                 |
| 8  | Guarulhos              | Sorocaba              | Sorocaba              | Avaré                 | Assis                 |
| 9  | Barueri                | Santa Isabel          | Araraquara            | Marília               | Lins                  |
| 10 | Campinas               | Jundiaí               | Assis                 | Registro              | Registro              |
| 11 | Cotia                  | Piracicaba            | Jaboticabal           | Itapetininga          | Araraquara            |
| 12 | Jaguariúna             | Marília               | Tatuí                 | Taubaté               | Avaré                 |
| 13 | Osasco                 | Bauru                 | Piracicaba            | Jaú                   | Sorocaba              |
| 14 | São José do Rio Preto  | São José dos Campos   | Jundiaí               | Araraquara            | Catanduva             |
| 15 | São José dos Campos    | Araraquara            | Itapetininga          | Catanduva             | Franca                |
| 16 | Suzano                 | Americana             | São José dos Campos   | Assis                 | Araçatuba             |
| 17 | Taubaté                | São Carlos            | Lins                  | Dracena               | Ourinhos              |
| 18 | Vargem Grande Paulista | Jaboticabal           | Taubaté               | Itapeva               | Itapetininga          |
| 19 | Hortolândia            | Praia Grande          | São Carlos            | Lins                  | Jaboticabal           |
| 20 | Mogi das Cruzes        | Registro              | Catanduva             | Bragança Paulista     | Jaú                   |
| 21 | Embu das Artes         | Taubaté               | Americana             | Jundiaí               | Jundiaí               |
| 22 | Iracemápolis           | Assis                 | Tupã                  | Bebedouro             | Dracena               |
| 23 | Jundiaí                | Lorena                | Registro              | Barretos              | Bebedouro             |
| 24 | Poá                    | São Vicente           | Porto Ferreira        | São José dos Campos   | São Roque             |
| 25 | Ribeirão Pires         | Itu                   | Parapuã               | Jaboticabal           | Taubaté               |
| 26 | Rio Claro              | Sertãozinho           | Votuporanga           | Atibaia               | Itapeva               |
| 27 | São Sebastião          | Porto Ferreira        | Limeira               | Sorocaba              | Piracicaba            |
| 28 | Taboão da Serra        | Limeira               | São João da Boa Vista | Araçatuba             | Atibaia               |
| 29 | Valinhos               | Rio Claro             | Mogi das Cruzes       | Santa Isabel          | Tupã                  |
| 30 | Arujá                  | Araras                | Lindóia               | Pirapora do Bom Jesus | São José dos Campos   |

Table S6: List of the first 30 cities from the Sao Paulo State (SP) sorted according to their associated metric under  $\eta_2$ . In the second column, the cities are ordered according to the date of their first confirmed case.

|    | COVID-19               | $s$                   | $k$                   | $\mathcal{V}$         | $b$                   |
|----|------------------------|-----------------------|-----------------------|-----------------------|-----------------------|
| 1  | São Paulo              | São Paulo             | São Paulo             | São Paulo             | São Paulo             |
| 2  | Santana de Parnaíba    | Campinas              | Campinas              | Bauru                 | Bauru                 |
| 3  | Ferraz de Vasconcelos  | Ribeirão Preto        | Ribeirão Preto        | Marília               | Marília               |
| 4  | Mauá                   | Peruíbe               | São José do Rio Preto | Ribeirão Preto        | Ribeirão Preto        |
| 5  | Santo André            | Santa Isabel          | Sorocaba              | São José do Rio Preto | São José do Rio Preto |
| 6  | São Bernardo do Campo  | São José do Rio Preto | Marília               | Assis                 | Campinas              |
| 7  | São Caetano do Sul     | Mogi das Cruzes       | Jundiaí               | Miracatu              | Assis                 |
| 8  | Guarulhos              | Jundiaí               | Taubaté               | Campinas              | Presidente Prudente   |
| 9  | Barueri                | Sorocaba              | São José dos Campos   | Sorocaba              | Miracatu              |
| 10 | Campinas               | Piracicaba            | Presidente Prudente   | Jundiaí               | Araraquara            |
| 11 | Cotia                  | Praia Grande          | Piracicaba            | Santa Isabel          | Sorocaba              |
| 12 | Jaguariúna             | São José dos Campos   | Peruíbe               | Atibaia               | Santa Isabel          |
| 13 | Osasco                 | Presidente Prudente   | Lorena                | Presidente Prudente   | Registro              |
| 14 | São José do Rio Preto  | Lorena                | Aparecida             | Registro              | Tupã                  |
| 15 | São José dos Campos    | Taubaté               | Tupã                  | Araraquara            | Jacareí               |
| 16 | Suzano                 | São Vicente           | São Roque             | Rio Claro             | São Roque             |
| 17 | Taubaté                | Registro              | Santa Isabel          | Piracicaba            | Jundiaí               |
| 18 | Vargem Grande Paulista | São Roque             | Rio Claro             | Tupã                  | Rio Claro             |
| 19 | Hortolândia            | Itu                   | Registro              | São Roque             | Atibaia               |
| 20 | Mogi das Cruzes        | Rio Claro             | Jaboticabal           | Matão                 | Bragança Paulista     |
| 21 | Embu das Artes         | Araraquara            | Guaratinguetá         | Jacareí               | Matão                 |
| 22 | Iracemápolis           | Atibaia               | Bauru                 | Bragança Paulista     | Piracicaba            |
| 23 | Jundiaí                | Sertãozinho           | Mogi das Cruzes       | Mogi das Cruzes       | Mogi das Cruzes       |
| 24 | Poá                    | Aparecida             | Jacareí               | Araras                | São Manuel            |
| 25 | Ribeirão Pires         | Guaratinguetá         | Itu                   | Peruíbe               | Parapuã               |
| 26 | Rio Claro              | Americana             | Bragança Paulista     | São Carlos            | Araras                |
| 27 | São Sebastião          | São Carlos            | Atibaia               | Jaboticabal           | Lençóis Paulista      |
| 28 | Taboão da Serra        | Pirapora do Bom Jesus | Araraquara            | Franca                | Aparecida             |
| 29 | Valinhos               | Jacareí               | Sertãozinho           | Jaú                   | Guaratinguetá         |
| 30 | Arujá                  | Marília               | São Vicente           | São Manuel            | Jaboticabal           |

Table S7: List of the first 30 Brazilian cities (BR) sorted according to their associated metric under  $\eta_0$ . In the second column, the cities are ordered according to the date of their first confirmed case.

|    | COVID-19                   | $s$                        | $k$                        | $\mathcal{V}$              | $b$                        |
|----|----------------------------|----------------------------|----------------------------|----------------------------|----------------------------|
| 1  | São Paulo (SP)             | São Paulo (SP)             | São Paulo (SP)             | São Paulo (SP)             | São Paulo (SP)             |
| 2  | Barra Mansa (RJ)           | Belo Horizonte (MG)        | Belo Horizonte (MG)        | Belo Horizonte (MG)        | Belo Horizonte (MG)        |
| 3  | Feira de Santana (BA)      | Salvador (BA)              | Goiânia (GO)               | Goiânia (GO)               | Goiânia (GO)               |
| 4  | Rio de Janeiro (RJ)        | Aracaju (SE)               | Campinas (SP)              | Fortaleza (CE)             | Brasília (DF)              |
| 5  | Brasília (DF)              | Campinas (SP)              | Brasília (DF)              | Porto Alegre (RS)          | Rio de Janeiro (RJ)        |
| 6  | Santana de Parnaíba (SP)   | Goiânia (GO)               | Rio de Janeiro (RJ)        | Natal (RN)                 | Porto Alegre (RS)          |
| 7  | Divinópolis (MG)           | Fortaleza (CE)             | Feira de Santana (BA)      | Curitiba (PR)              | Fortaleza (CE)             |
| 8  | Maceió (AL)                | Porto Alegre (RS)          | Porto Alegre (RS)          | Brasília (DF)              | Campinas (SP)              |
| 9  | Campo Bom (RS)             | Campina Grande (PB)        | Curitiba (PR)              | São Luís (MA)              | Curitiba (PR)              |
| 10 | Porto Alegre (RS)          | Feira de Santana (BA)      | Salvador (BA)              | Campina Grande (PB)        | Natal (RN)                 |
| 11 | Caxias do Sul (RS)         | Recife (PE)                | Anápolis (GO)              | Arapiraca (AL)             | Feira de Santana (BA)      |
| 12 | Cianorte (PR)              | Caruaru (PE)               | Cascavel (PR)              | Patos (PB)                 | Salvador (BA)              |
| 13 | Curitiba (PR)              | Rio de Janeiro (RJ)        | Ribeirão Preto (SP)        | Rio de Janeiro (RJ)        | Ribeirão Preto (SP)        |
| 14 | Ferraz de Vasconcelos (SP) | Carpina (PE)               | Fortaleza (CE)             | Teresina (PI)              | Teresina (PI)              |
| 15 | Florianópolis (SC)         | Teresina (PI)              | Maringá (PR)               | Aracaju (SE)               | Recife (PE)                |
| 16 | Goiânia (GO)               | Ribeirão Preto (SP)        | Carazinho (RS)             | Palmas (TO)                | Campina Grande (PB)        |
| 17 | Ipatinga (MG)              | Curitiba (PR)              | São José do Rio Preto (SP) | Ribeirão Preto (SP)        | São Luís (MA)              |
| 18 | Natal (RN)                 | Brasília (DF)              | Teresina (PI)              | Ponte Nova (MG)            | Anápolis (GO)              |
| 19 | Niterói (RJ)               | Limoeiro (PE)              | Barreiras (BA)             | São José do Rio Preto (SP) | João Pessoa (PB)           |
| 20 | Recife (PE)                | Paudalho (PE)              | Campo Grande (MS)          | Picos (PI)                 | Aracaju (SE)               |
| 21 | Rio Verde (GO)             | Belém (PA)                 | Vitória da Conquista (BA)  | Manaus (AM)                | São José do Rio Preto (SP) |
| 22 | Joinville (SC)             | Patos (PB)                 | Uberlândia (MG)            | Governador Valadares (MG)  | Maceió (AL)                |
| 23 | Manaus (AM)                | São José do Rio Preto (SP) | Governador Valadares (MG)  | Maceió (AL)                | Maringá (PR)               |
| 24 | Salvador (BA)              | Castanhal (PA)             | Recife (PE)                | Rio Branco (AC)            | Governador Valadares (MG)  |
| 25 | Aracaju (SE)               | Cascavel (PR)              | Presidente Prudente (SP)   | João Pessoa (PB)           | Cascavel (PR)              |
| 26 | Campo Grande (MS)          | Maringá (PR)               | São Leopoldo (RS)          | Florianópolis (SC)         | Florianópolis (SC)         |
| 27 | Juiz de Fora (MG)          | São Leopoldo (RS)          | Cuiabá (MT)                | Salinas (MG)               | Carazinho (RS)             |
| 28 | Patrocínio (MG)            | Maceió (AL)                | Florianópolis (SC)         | Concórdia (SC)             | Uberlândia (MG)            |
| 29 | Rancho Queimado (SC)       | Arapiraca (AL)             | Londrina (PR)              | Ijuí (RS)                  | Juiz de Fora (MG)          |
| 30 | Braço do Norte (SC)        | Maruim (SE)                | Chapecó (SC)               | Mossoró (RN)               | Campo Grande (MS)          |



Table S8: List of the first 30 Brazilian cities (BR) sorted according to their associated metric under  $\eta_1$ . In the second column, the cities are ordered according to the date of their first confirmed case.

|    | COVID-19                   | $s$                        | $k$                        | $\mathcal{V}$              | $b$                        |
|----|----------------------------|----------------------------|----------------------------|----------------------------|----------------------------|
| 1  | São Paulo (SP)             | São Paulo (SP)             | São Paulo (SP)             | São Paulo (SP)             | São Paulo (SP)             |
| 2  | Barra Mansa (RJ)           | Aracaju (SE)               | Belo Horizonte (MG)        | Belo Horizonte (MG)        | Goiânia (GO)               |
| 3  | Feira de Santana (BA)      | Salvador (BA)              | Goiânia (GO)               | Goiânia (GO)               | Recife (PE)                |
| 4  | Rio de Janeiro (RJ)        | Belo Horizonte (MG)        | Porto Alegre (RS)          | Teresina (PI)              | Belo Horizonte (MG)        |
| 5  | Brasília (DF)              | Fortaleza (CE)             | Salvador (BA)              | Fortaleza (CE)             | Feira de Santana (BA)      |
| 6  | Santana de Parnaíba (SP)   | Caruaru (PE)               | Campinas (SP)              | Recife (PE)                | Teresina (PI)              |
| 7  | Divinópolis (MG)           | Campina Grande (PB)        | Feira de Santana (BA)      | Brasília (DF)              | Brasília (DF)              |
| 8  | Maceió (AL)                | Recife (PE)                | Curitiba (PR)              | Natal (RN)                 | Petrolina (PE)             |
| 9  | Campo Bom (RS)             | Porto Alegre (RS)          | Fortaleza (CE)             | Campo Grande (MS)          | Fortaleza (CE)             |
| 10 | Porto Alegre (RS)          | Feira de Santana (BA)      | Teresina (PI)              | São José do Rio Preto (SP) | Rio de Janeiro (RJ)        |
| 11 | Caxias do Sul (RS)         | Carpina (PE)               | Rio de Janeiro (RJ)        | Porto Alegre (RS)          | Porto Alegre (RS)          |
| 12 | Cianorte (PR)              | Campinas (SP)              | Cascavel (PR)              | Araguaína (TO)             | Curitiba (PR)              |
| 13 | Curitiba (PR)              | Goiânia (GO)               | Ribeirão Preto (SP)        | Feira de Santana (BA)      | Cascavel (PR)              |
| 14 | Ferraz de Vasconcelos (SP) | Rio de Janeiro (RJ)        | Londrina (PR)              | Campina Grande (PB)        | Milagres (BA)              |
| 15 | Florianópolis (SC)         | Teresina (PI)              | Recife (PE)                | Vitória da Conquista (BA)  | Carazinho (RS)             |
| 16 | Goiânia (GO)               | Limoeiro (PE)              | São José do Rio Preto (SP) | Aracaju (SE)               | Salvador (BA)              |
| 17 | Ipatinga (MG)              | Paudalho (PE)              | Brasília (DF)              | Rio de Janeiro (RJ)        | Campinas (SP)              |
| 18 | Natal (RN)                 | Ribeirão Preto (SP)        | Cuiabá (MT)                | Picos (PI)                 | Cuiabá (MT)                |
| 19 | Niterói (RJ)               | Patos (PB)                 | Aracaju (SE)               | Arapiraca (AL)             | Campo Grande (MS)          |
| 20 | Recife (PE)                | Castanhal (PA)             | São Leopoldo (RS)          | Curitiba (PR)              | Aracaju (SE)               |
| 21 | Rio Verde (GO)             | Belém (PA)                 | Maringá (PR)               | Juiz de Fora (MG)          | Natal (RN)                 |
| 22 | Joinville (SC)             | Maruim (SE)                | Campina Grande (PB)        | Maceió (AL)                | São José do Rio Preto (SP) |
| 23 | Manaus (AM)                | Rosário do Catete (SE)     | Campo Grande (MS)          | Rio Branco (AC)            | Salgueiro (PE)             |
| 24 | Salvador (BA)              | Curitiba (PR)              | Carazinho (RS)             | Cascavel (PR)              | Barreiras (BA)             |
| 25 | Aracaju (SE)               | Arapiraca (AL)             | Belém (PA)                 | Mossoró (RN)               | Maceió (AL)                |
| 26 | Campo Grande (MS)          | Laranjeiras (SE)           | Caruaru (PE)               | Manhuaçu (MG)              | Governador Valadares (MG)  |
| 27 | Juiz de Fora (MG)          | Itabaiana (SE)             | São Luís (MA)              | São Luís (MA)              | Ribeirão Preto (SP)        |
| 28 | Patrocínio (MG)            | Imperatriz (MA)            | Presidente Prudente (SP)   | Franca (SP)                | Vitória (ES)               |
| 29 | Rancho Queimado (SC)       | Maceió (AL)                | Juiz de Fora (MG)          | Presidente Prudente (SP)   | Campina Grande (PB)        |
| 30 | Braço do Norte (SC)        | São José do Rio Preto (SP) | Governador Valadares (MG)  | Pau dos Ferros (RN)        | Londrina (PR)              |

Table S9: List of the first 30 Brazilian cities (BR) sorted according to their associated metric under  $\eta_2$ . In the second column, the cities are ordered according to the date of their first confirmed case.

|    | COVID-19                   | $s$                         | $k$                        | $\mathcal{V}$              | $b$                       |
|----|----------------------------|-----------------------------|----------------------------|----------------------------|---------------------------|
| 1  | São Paulo (SP)             | São Paulo (SP)              | São Paulo (SP)             | São Paulo (SP)             | São Paulo (SP)            |
| 2  | Barra Mansa (RJ)           | Aracaju (SE)                | Salvador (BA)              | Salvador (BA)              | Salvador (BA)             |
| 3  | Feira de Santana (BA)      | Salvador (BA)               | Belo Horizonte (MG)        | Goiânia (GO)               | Goiânia (GO)              |
| 4  | Rio de Janeiro (RJ)        | Caruaru (PE)                | Fortaleza (CE)             | Belo Horizonte (MG)        | Imperatriz (MA)           |
| 5  | Brasília (DF)              | Carpina (PE)                | Porto Alegre (RS)          | Aracaju (SE)               | Cícero Dantas (BA)        |
| 6  | Santana de Parnaíba (SP)   | Campina Grande (PB)         | Aracaju (SE)               | Fortaleza (CE)             | Paulo Afonso (BA)         |
| 7  | Divinópolis (MG)           | Recife (PE)                 | Campinas (SP)              | Teresina (PI)              | Jeremoabo (BA)            |
| 8  | Maceió (AL)                | Belo Horizonte (MG)         | Feira de Santana (BA)      | Porto Alegre (RS)          | Serra Talhada (PE)        |
| 9  | Campo Bom (RS)             | Fortaleza (CE)              | Campina Grande (PB)        | Rio de Janeiro (RJ)        | Recife (PE)               |
| 10 | Porto Alegre (RS)          | Limoeiro (PE)               | Goiânia (GO)               | Vitória (ES)               | Teresina (PI)             |
| 11 | Caxias do Sul (RS)         | Paudalho (PE)               | Caruaru (PE)               | Cuiabá (MT)                | Florianópolis (SC)        |
| 12 | Cianorte (PR)              | Feira de Santana (BA)       | Recife (PE)                | Salgueiro (PE)             | Picos (PI)                |
| 13 | Curitiba (PR)              | Rio de Janeiro (RJ)         | Rio de Janeiro (RJ)        | Ribeirão Preto (SP)        | Rio de Janeiro (RJ)       |
| 14 | Ferraz de Vasconcelos (SP) | Campinas (SP)               | Teresina (PI)              | Picos (PI)                 | Feira de Santana (BA)     |
| 15 | Florianópolis (SC)         | Porto Alegre (RS)           | São Leopoldo (RS)          | Recife (PE)                | Marcolândia (PI)          |
| 16 | Goiânia (GO)               | Maruim (SE)                 | Ribeirão Preto (SP)        | Florianópolis (SC)         | Araripina (PE)            |
| 17 | Ipatinga (MG)              | Rosário do Catete (SE)      | Belém (PA)                 | Maceió (AL)                | Belo Horizonte (MG)       |
| 18 | Natal (RN)                 | Patos (PB)                  | São José do Rio Preto (SP) | Imperatriz (MA)            | Aracaju (SE)              |
| 19 | Niterói (RJ)               | Teresina (PI)               | Arapiraca (AL)             | Campina Grande (PB)        | Ouricuri (PE)             |
| 20 | Recife (PE)                | Castanhal (PA)              | Marabá (PA)                | Assis (SP)                 | Paraíso do Tocantins (TO) |
| 21 | Rio Verde (GO)             | Laranjeiras (SE)            | Rosário do Catete (SE)     | São José do Rio Preto (SP) | Porangatu (GO)            |
| 22 | Joinville (SC)             | Arapiraca (AL)              | Maruim (SE)                | Propriá (SE)               | Fortaleza (CE)            |
| 23 | Manaus (AM)                | Itabaiana (SE)              | Maceió (AL)                | Arapiraca (AL)             | Salgueiro (PE)            |
| 24 | Salvador (BA)              | Goiânia (GO)                | João Pessoa (PB)           | Cascavel (PR)              | Crato (CE)                |
| 25 | Aracaju (SE)               | Belém (PA)                  | Sobral (CE)                | Marcolândia (PI)           | Petrolândia (PE)          |
| 26 | Campo Grande (MS)          | Lagoa do Carro (PE)         | Laranjeiras (SE)           | Presidente Prudente (SP)   | Floresta (PE)             |
| 27 | Juiz de Fora (MG)          | Ribeirão Preto (SP)         | Patos (PB)                 | Araripina (PE)             | Porto Alegre (RS)         |
| 28 | Patrocínio (MG)            | Vitória de Santo Antão (PE) | Castanhal (PA)             | Curitiba (PR)              | Milagres (BA)             |
| 29 | Rancho Queimado (SC)       | Lagoa Seca (PB)             | Governador Valadares (MG)  | Serra Talhada (PE)         | Jequié (BA)               |
| 30 | Braço do Norte (SC)        | Escada (PE)                 | Imperatriz (MA)            | Itabuna (BA)               | Campina Grande (PB)       |
